# Supplementary material
Source: publisher figshare collection journal article supplement (https://tandf.figshare.com/ndownloader/files/2019795)

# **SUPPORTING INFORMATION FOR**

## **Fast and Efficient Green Synthesis of Thiosulfonate S-esters by Microwave Supported Permanganate Oxidation of Symmetrical Disulfides**

Thi Xuan Thi Luu<sup>1,2\*</sup>, Thao-Tran Thi Nguyen<sup>1,2</sup>, Thach Ngoc Le<sup>2</sup>, Jens Spanget-Larsen<sup>1</sup>, Fritz Duus<sup>1</sup>

<sup>1</sup> *Department of Science, Systems and Models, Roskilde University, PO Box 260, DK-4000 Roskilde, Denmark*

<sup>2</sup> *Department of Organic Chemistry, University of Science of Ho Chi Minh City, 227 Nguyen Van Cu St., Dist. 5, Ho Chi Minh City, Vietnam*

\* Corresponding author: Email: ltxthi@hcmus.edu.vn; Tel.: +84-838-353-659; Fax: +84-838-350-096.

### **CONTENTS**

#### **1. Mass spectra of by-product**

Please see the attachment.

File: C:\DATA1\THI\Y06\010706\4601002.D  
Operator:  
Date Acquired: 24 Jan 98 1:59 am  
Method File: quinon.M  
Sample Name: DS12201  
Misc Info:  
ALS vial: 46

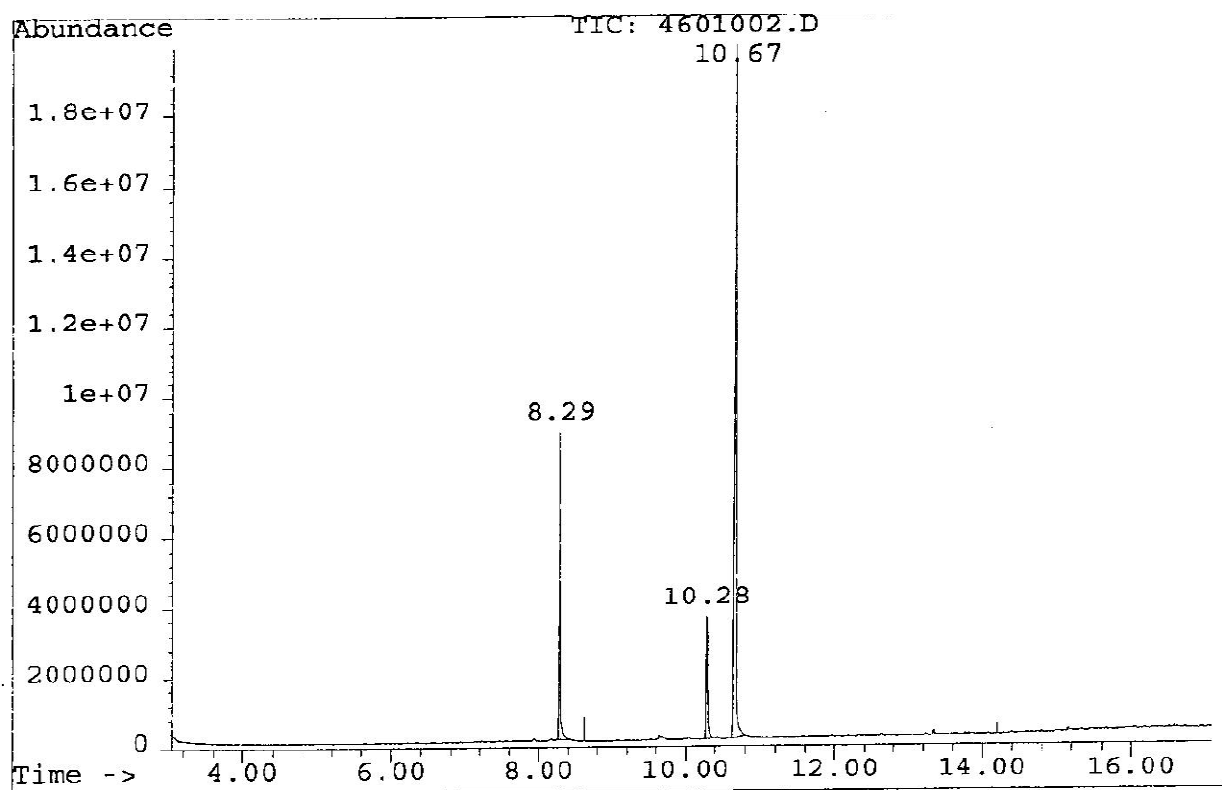

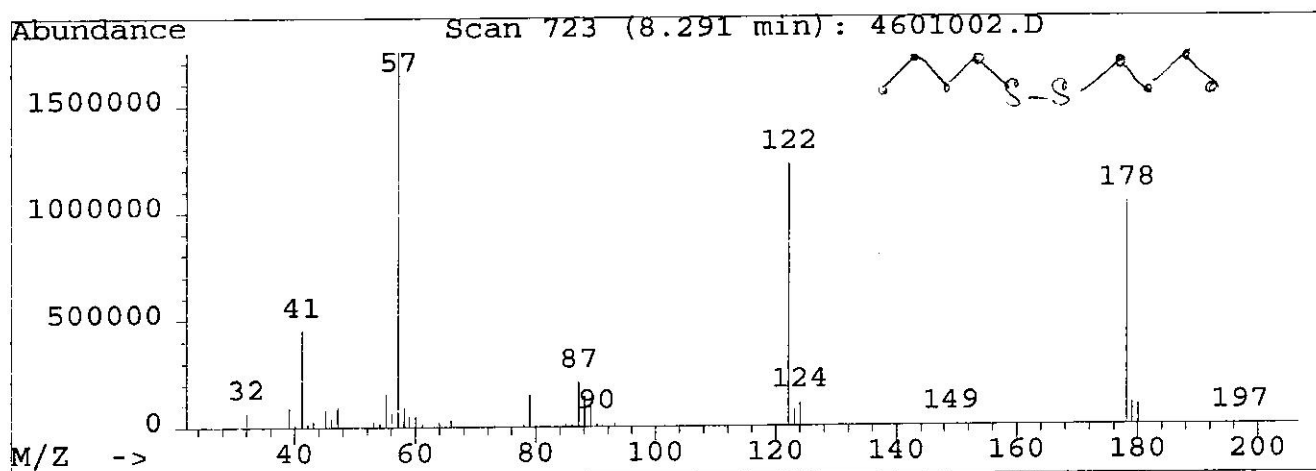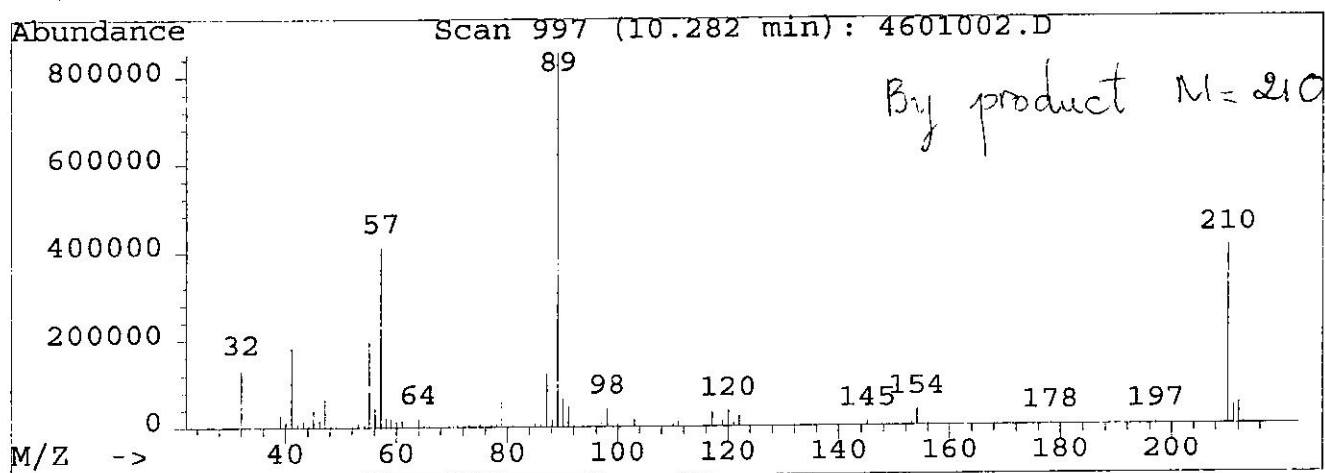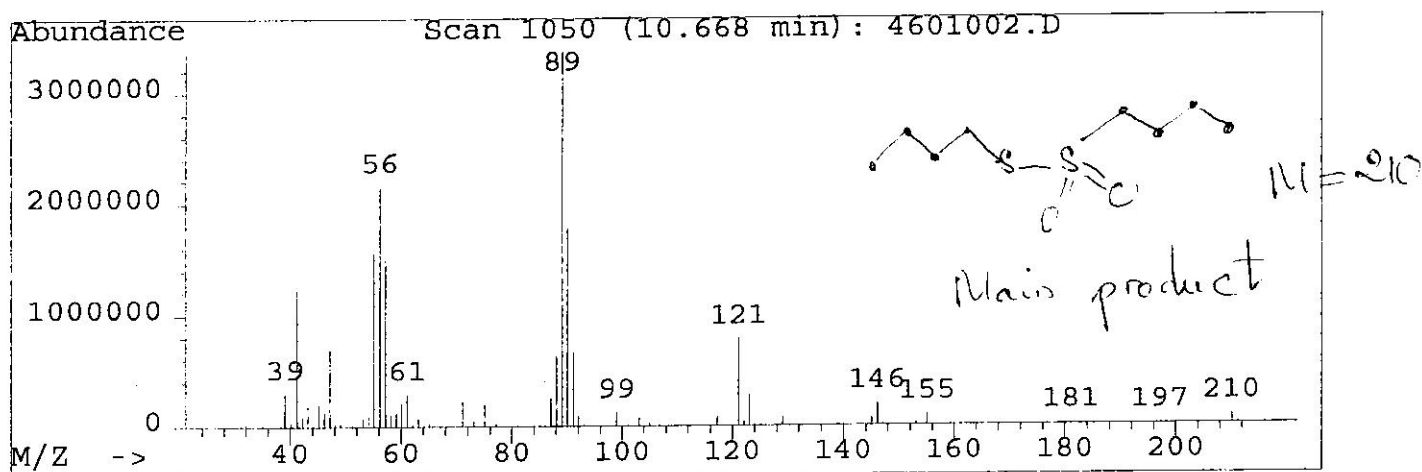

Supplement: Supplementary file 1 [file 2019795]
